# Supplementary material for: Effective density of Aquadag and fullerene soot black carbon reference materials used for SP2 calibration
Source: Copernicus journal article supplement (doi:10.5194/amt-4-2851-2011), 2011-12-22
Supplement: Supplementary file 1 [file Table S1.pdf › Supplementary/Table S1.pdf]

Table S1: Experimental results for Aquadag and fullerene soot.

| Aquadag              |       |                     | Aquadag              |       |                     | Aquadag                 |       |                     | Aquadag                 |       |                     |
|----------------------|-------|---------------------|----------------------|-------|---------------------|-------------------------|-------|---------------------|-------------------------|-------|---------------------|
| lot: 9054; "classic" |       |                     | lot: 9054; "classic" |       |                     | lot: 9627; "new bottle" |       |                     | lot: 9627; "new bottle" |       |                     |
| investigator: PSI    |       |                     | investigator: UofA   |       |                     | investigator: PSI       |       |                     | investigator: UofA      |       |                     |
| method: DMA+APM      |       |                     | method: DMA+CPMA     |       |                     | method: DMA+APM         |       |                     | method: DMA+CPMA        |       |                     |
| diameter             | mass  | $\rho_{\text{eff}}$ | diameter             | mass  | $\rho_{\text{eff}}$ | diameter                | mass  | $\rho_{\text{eff}}$ | diameter                | mass  | $\rho_{\text{eff}}$ |
| nm                   | fg    | kg/m <sup>3</sup>   | nm                   | fg    | kg/m <sup>3</sup>   | nm                      | fg    | kg/m <sup>3</sup>   | nm                      | fg    | kg/m <sup>3</sup>   |
| 61                   | 0.116 | 979                 | 70                   | 0.158 | 879                 | 70                      | 0.178 | 990                 | 70                      | 0.161 | 899                 |
| 152                  | 1.27  | 692                 | 80                   | 0.227 | 846                 | 150                     | 1.26  | 712                 | 80                      | 0.231 | 862                 |
| 252                  | 5.36  | 640                 | 90                   | 0.309 | 810                 | 250                     | 5.35  | 654                 | 90                      | 0.311 | 815                 |
| 402                  | 18.6  | 546                 | 100                  | 0.405 | 774                 | 400                     | 20.3  | 605                 | 100                     | 0.414 | 791                 |
| 703                  | 68.1  | 374                 | 125                  | 0.733 | 716                 | 700                     | 69.9  | 389                 | 125                     | 0.743 | 727                 |
|                      |       |                     | 150                  | 1.27  | 718                 |                         |       |                     | 125                     | 0.734 | 718                 |
|                      |       |                     | 175                  | 2.06  | 732                 |                         |       |                     | 150                     | 1.28  | 723                 |
|                      |       |                     | 500                  | 34.3  | 524                 |                         |       |                     | 175                     | 2.11  | 751                 |
|                      |       |                     | 175                  | 2.09  | 744                 |                         |       |                     | 200                     | 3.15  | 752                 |
|                      |       |                     | 200                  | 2.94  | 702                 |                         |       |                     | 200                     | 3.07  | 734                 |
|                      |       |                     | 300                  | 8.67  | 613                 |                         |       |                     | 300                     | 9.12  | 645                 |
|                      |       |                     | 400                  | 18.2  | 542                 |                         |       |                     | 400                     | 19.7  | 588                 |
|                      |       |                     | 175                  | 2.04  | 727                 |                         |       |                     | 500                     | 34.3  | 524                 |
|                      |       |                     | 500                  | 29.2  | 445                 |                         |       |                     | 500                     | 33.7  | 515                 |
|                      |       |                     | 500                  | 31.2  | 477                 |                         |       |                     |                         |       |                     |
|                      |       |                     | 400                  | 19.2  | 572                 |                         |       |                     |                         |       |                     |
|                      |       |                     | 70                   | 0.155 | 864                 |                         |       |                     |                         |       |                     |
|                      |       |                     | 150                  | 1.27  | 718                 |                         |       |                     |                         |       |                     |
|                      |       |                     | 125                  | 0.734 | 717                 |                         |       |                     |                         |       |                     |

| fullerene soot    |      |                     | fullerene soot    |       |                     |
|-------------------|------|---------------------|-------------------|-------|---------------------|
| stock: 40971      |      |                     | stock: 40971      |       |                     |
| lot: FS12S011     |      |                     | lot: FS12S011     |       |                     |
| investigator: PSI |      |                     | investigator: PSI |       |                     |
| method: DMA+APM   |      |                     | method: APM+SP2   |       |                     |
| diameter          | mass | $\rho_{\text{eff}}$ | diameter          | mass  | $\rho_{\text{eff}}$ |
| nm                | fg   | kg/m <sup>3</sup>   | nm                | fg    | kg/m <sup>3</sup>   |
| 172               | 1.93 | 725                 | 71                | 0.198 | 1052                |
| 241               | 4.67 | 637                 | 91                | 0.357 | 893                 |
| 307               | 9.08 | 599                 | 112               | 0.593 | 814                 |
| 456               | 25.6 | 516                 | 132               | 0.912 | 759                 |
| 551               | 42.1 | 481                 | 152               | 1.32  | 718                 |
| 824               | 97.1 | 331                 | 172               | 1.86  | 693                 |
|                   |      |                     | 193               | 2.51  | 673                 |
|                   |      |                     | 223               | 3.74  | 646                 |
|                   |      |                     | 253               | 5.42  | 639                 |
|                   |      |                     | 283               | 7.47  | 628                 |
|                   |      |                     | 313               | 9.92  | 615                 |
|                   |      |                     | 344               | 12.6  | 595                 |
|                   |      |                     | 374               | 15.7  | 576                 |
|                   |      |                     | 404               | 19.2  | 555                 |
|                   |      |                     | 434               | 23.0  | 537                 |
|                   |      |                     | 464               | 26.9  | 515                 |
|                   |      |                     | 514               | 35.0  | 491                 |
