# Supplementary material for: Effective density of Aquadag and fullerene soot black carbon reference materials used for SP2 calibration
Source: Copernicus journal article supplement (doi:10.5194/amt-4-2851-2011), 2011-12-22
Supplement: Supplementary file 1 [file Table S1.xls]

## Sheet: Aquadag and fullerene soot
Table S1: Experimental results for Aquadag and fullerene soot.
Aquadag			Aquadag			Aquadag			Aquadag
lot: 9054; "classic"			lot: 9054; "classic"			lot: 9627; "new bottle"			lot: 9627; "new bottle"
investigator: PSI			investigator: UofA			investigator: PSI			investigator: UofA
method: DMA+APM			method: DMA+CPMA			method: DMA+APM			method: DMA+CPMA
diameter	mass	reff	diameter	mass	reff	diameter	mass	reff	diameter	mass	reff
nm	fg	kg/m3	nm	fg	kg/m3	nm	fg	kg/m3	nm	fg	kg/m3
61	0.116392	979.346	70	0.158	879	70	0.17785	990.287	70	0.161	899
152	1.2725	692.034	80	0.227	846	150	1.259	712.448	80	0.231	862
252	5.36442	640.21	90	0.309	810	250	5.348	653.691	90	0.311	815
402	18.5814	546.262	100	0.405	774	400	20.261	604.62	100	0.414	791
703	68.1115	374.417	125	0.733	716	700	69.854	388.954	125	0.743	727
			150	1.27	718				125	0.734	718
			175	2.06	732				150	1.28	723
			500	34.3	524				175	2.11	751
			175	2.09	744				200	3.15	752
			200	2.94	702				200	3.07	734
			300	8.67	613				300	9.12	645
			400	18.2	542				400	19.7	588
			175	2.04	727				500	34.3	524
			500	29.2	445				500	33.7	515
			500	31.2	477
			400	19.2	572
			70	0.155	864
			150	1.27	718
			125	0.734	717
fullerene soot			fullerene soot
stock: 40971			stock: 40971
lot: FS12S011			lot: FS12S011
investigator: PSI			investigator: PSI
method: DMA+APM			method: APM+SP2
diameter	mass	reff	diameter	mass	reff
nm	fg	kg/m3	nm	fg	kg/m3
172	1.9305	724.579	71.1285	0.198142	1051.59
241	4.6673	636.819	91.4084	0.357066	892.878
307	9.0784	599.233	111.66	0.593051	813.581
456	25.597	515.58	131.899	0.912032	759.079
551	42.14	481.106	152.121	1.32261	717.572
824	97.0941	331.446	172.324	1.85652	692.888
			192.511	2.5131	672.735
			222.766	3.7405	646.226
			252.991	5.42143	639.44
			283.209	7.47129	628.168
			313.381	9.91608	615.352
			343.567	12.636	595.084
			373.721	15.7408	575.952
			403.856	19.1574	555.468
			433.999	22.9764	536.806
			464.135	26.9435	514.662
			514.357	34.9723	490.83
